# Supplementary material for: Superparamagnetic [sic] nanofibers by electrospinning
Source: Royal Society of Chemistry journal article supplement (doi:10.1039/c5ra27791d), 2016-01-01
Supplement: c5ra27791d1.pdf [file c5ra27791d1.pdf]

## Supporting information: Superparamagnetic [sic] nanofibers by electrospinning

R. L. Andersson, L. Cabedo, M. S. Hedenqvist, R.T. Olsson and V. Ström\*

### Supporting figures

Figure S1: Superparamagnetic magnetite size distribution

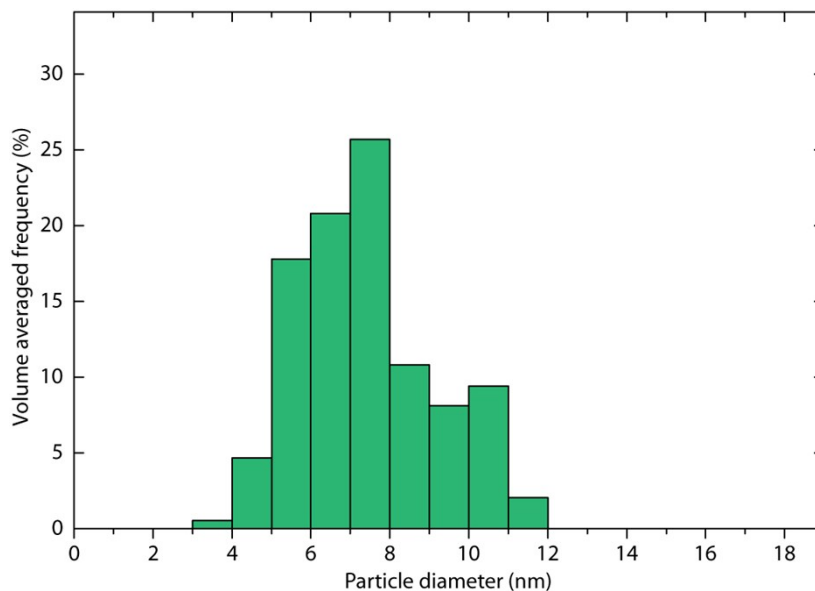

Figure S1. Number averaged size distribution of the superparamagnetic magnetite nanoparticles used to make the nanocomposite electrospun fibres, based on more than 500 individual measurements from TEM.

Figure S2: Nanocomposite fibre diameter distribution

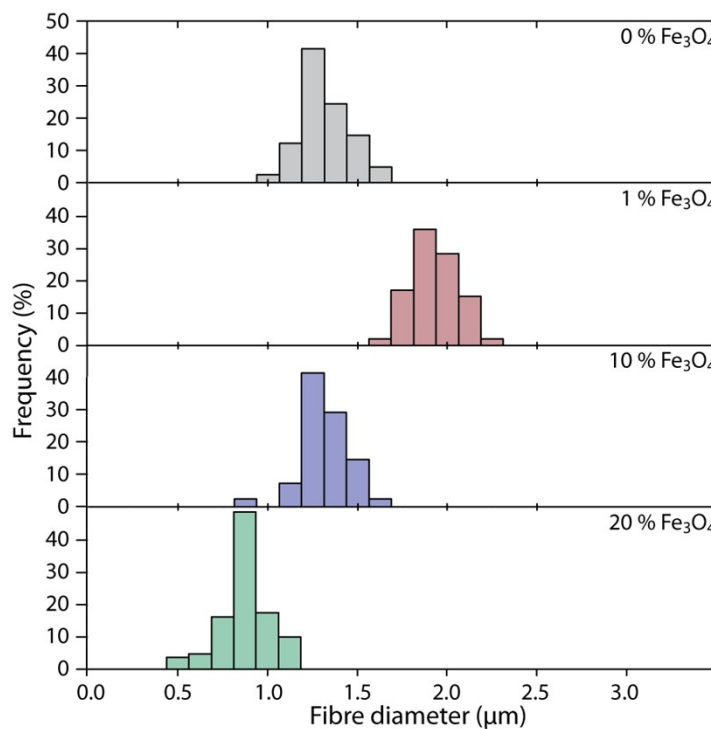

Figure S2. Number averaged fibre diameter distribution based on ca 250 individual measurements from SEM.

**Figure S3: Blocking temperature of the superparamagnetic nanocomposite fibres**

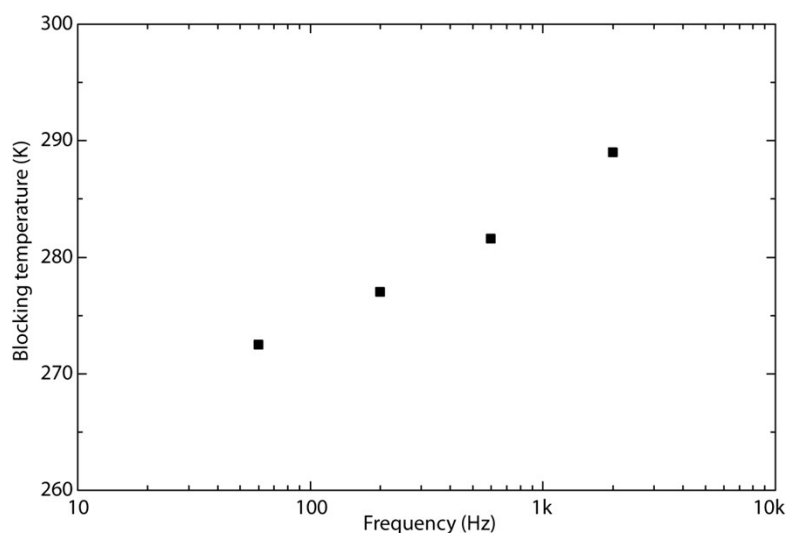

**Figure S3.** Blocking temperature (temperature when the real part of the AC susceptibility as at its maximum) vs. measurement frequency.
